# Supplementary material for: Extracellular vesicles expressing a single-chain variable fragment of an HIV-1 specific antibody selectively target Env+ tissues
Source: PubMed Central journal article supplement — Theranostics. 2019 Jul 29;9(19):5657–71. doi: 10.7150/thno.33925 (PMC6735399; doi:10.7150/thno.33925), 2019-07-29
Supplement: thnov09p5657s1.pdf [file thnov09p5657s1.pdf]

SUPPLEMENTAL INFORMATION

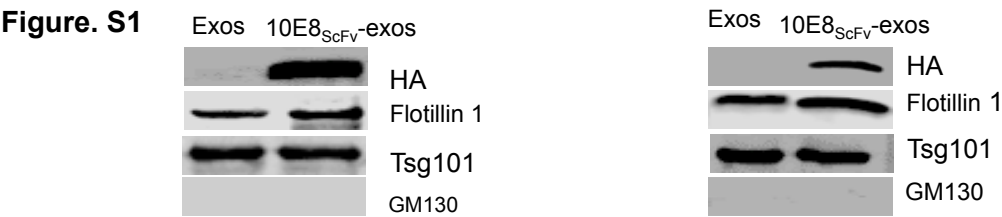

Figure. S1 Western blots of exosomes extracted from supernatants of HEK293T cells.

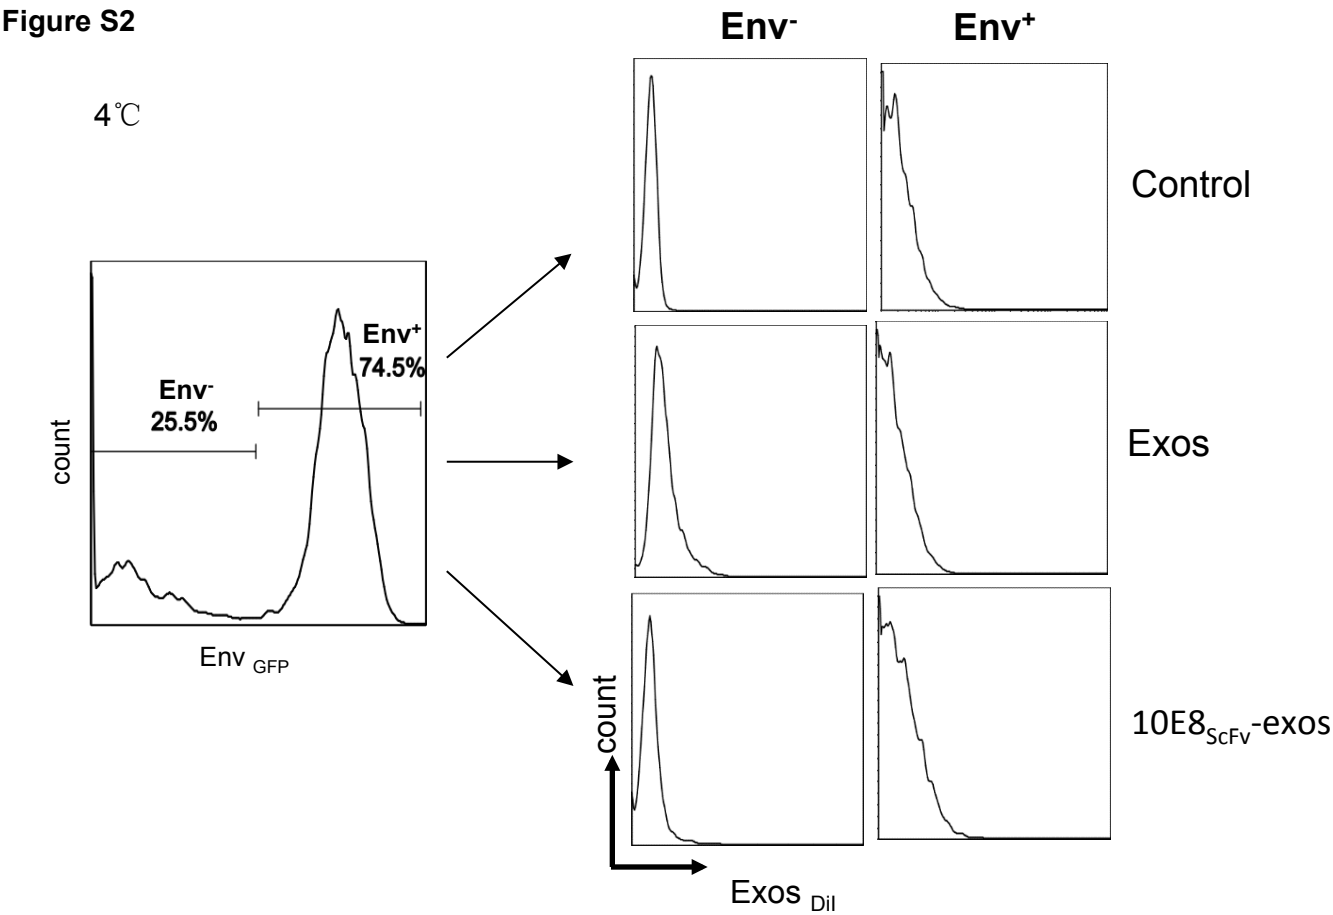

Figure S2 Uptake of fluorescently labeled exosomes by Env<sup>+</sup> or Env<sup>-</sup> cells was detected using flow cytometry. Dil-labeled exosomes were incubated with the Env<sup>+</sup> or Env<sup>-</sup> cells at 4°C for 24 hours.

Figure S3

4°C Dil-labeled 10E8<sub>ScFv</sub> exosomes

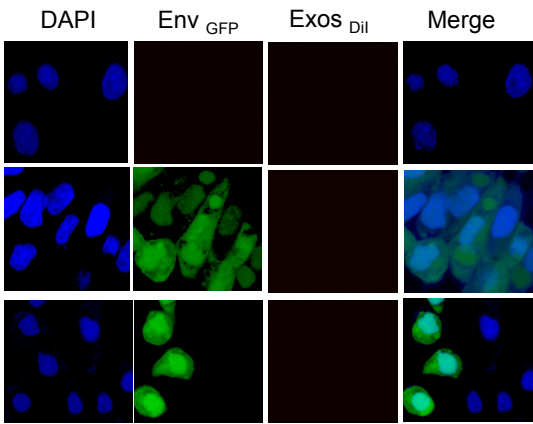

Figure S3 Confocal microscopic images of colocalization of exosomes and the target cell membrane at 4°C.

Figure S4

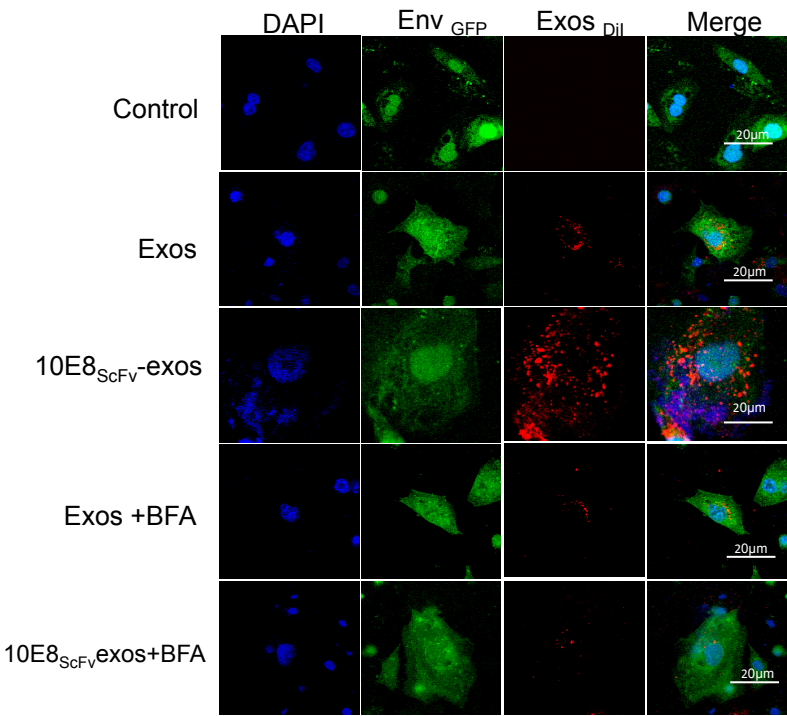

Figure S4 10E8<sub>ScFv</sub>-exos adsorption onto Env<sup>+</sup> cells were blocked by Brefeldin A.

Figure S5

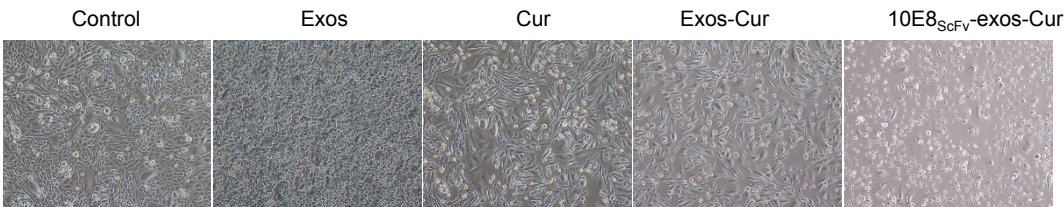

Figure S5 Images of the Env<sup>+</sup> cells after treated with medium (control), Exos, Exos-Cur, 10E8<sub>ScFv</sub>-exos, 10E8<sub>ScFv</sub>-exos-Cur, or free Cur for 24 h.

Figure S6

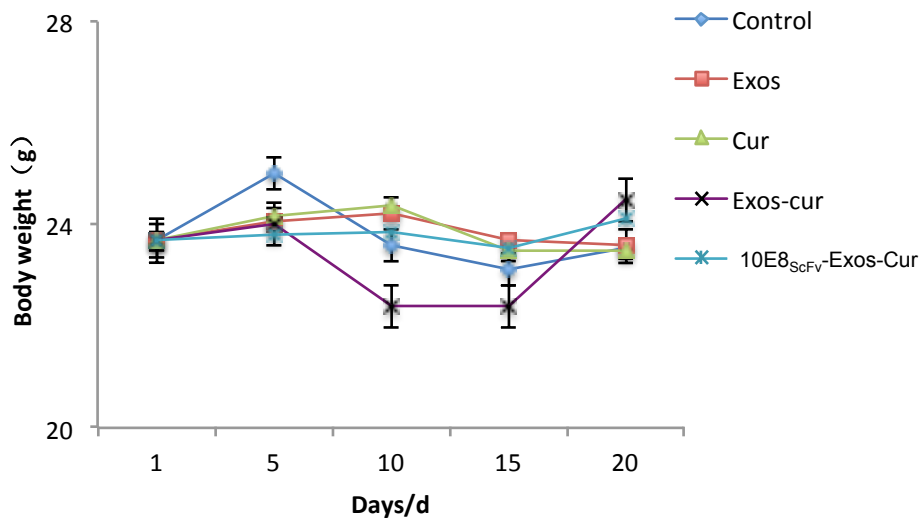

Figure S6 Body weight of control, Exos, Exos-Cur, 10E8<sub>ScFv</sub>-exos-Cur or Cur treated mice.

Table S1

| Groups                         | Tumor suppression rate |
|--------------------------------|------------------------|
| Control                        | --                     |
| Exos                           | 11.49%                 |
| Cur                            | 37.93%*                |
| Exos-Cur                       | 25.86%*                |
| 10E8 <sub>ScFv</sub> -exos-Cur | 71.26%*                |

Table S1 Tumor suppression rate of control, Exos, Exos-Cur, 10E8<sub>ScFv</sub>-exos-Cur or Cur treated mice.

**Figure S8**

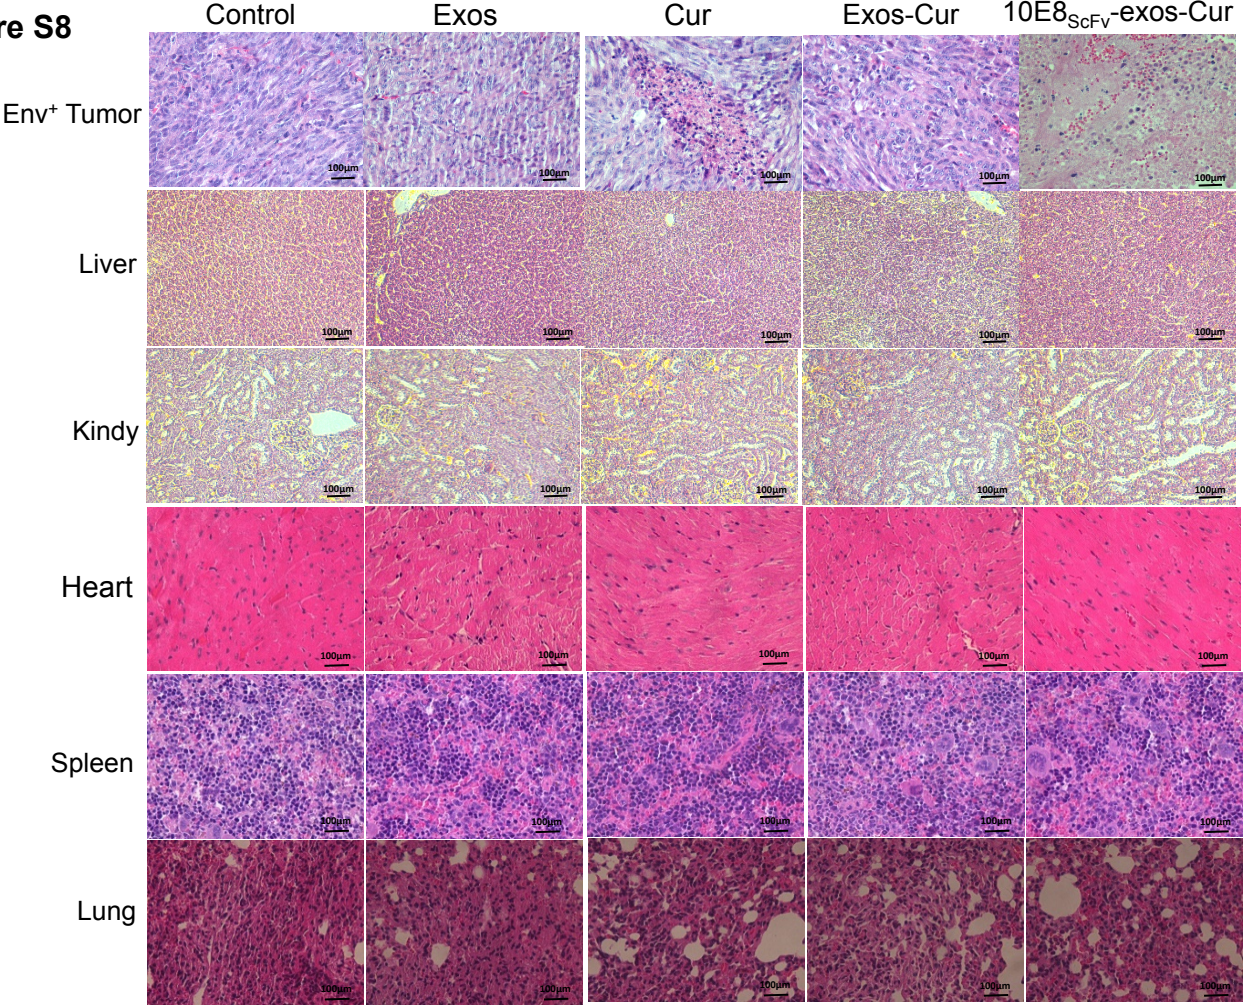

Figure S8 Various organs from mice treated as described in (A, B) were stained with hematoxylin and eosin (H&E). No overt tissue damage was observed in 10E8<sub>ScFv</sub>-exos-Cur treated mice.

**Figure S9**

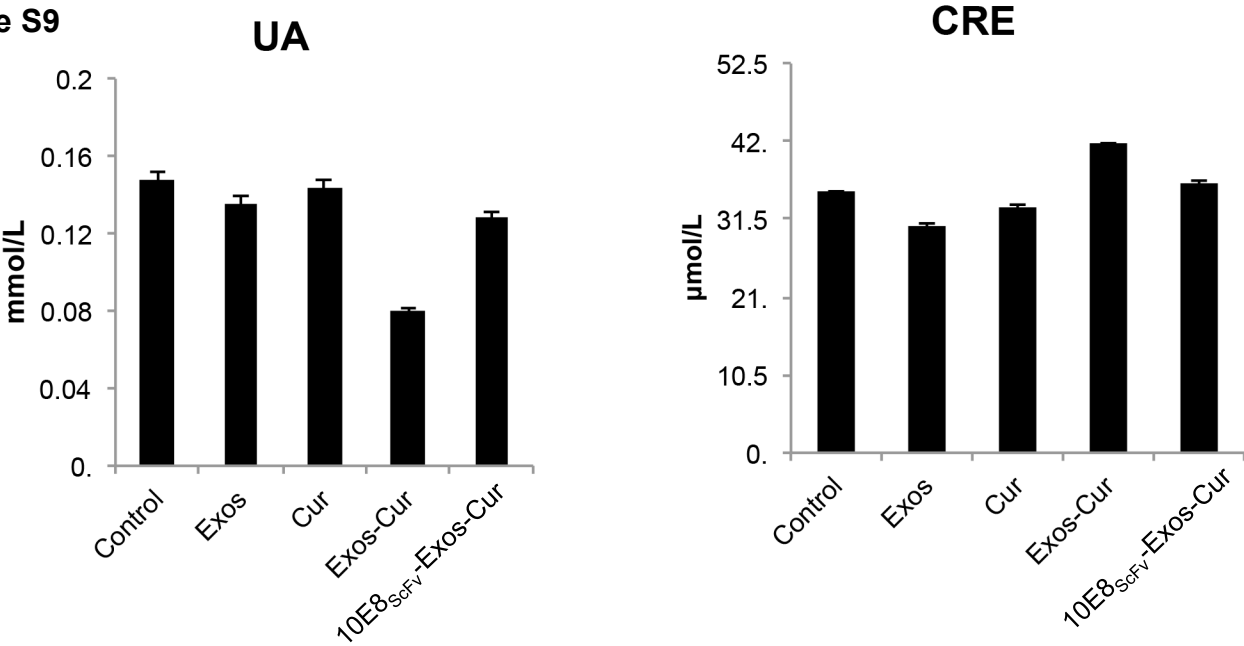

Figure S9 Evaluation of the toxicity profile of 10E8<sub>ScFv</sub>-exos-Cur. Measurement of serological markers of liver and kidney. Serum was collected from tumor-bearing mice injected with agents as described in (A) and the activities of CRE (A) and UA (B) were measured.

**Figure S10**

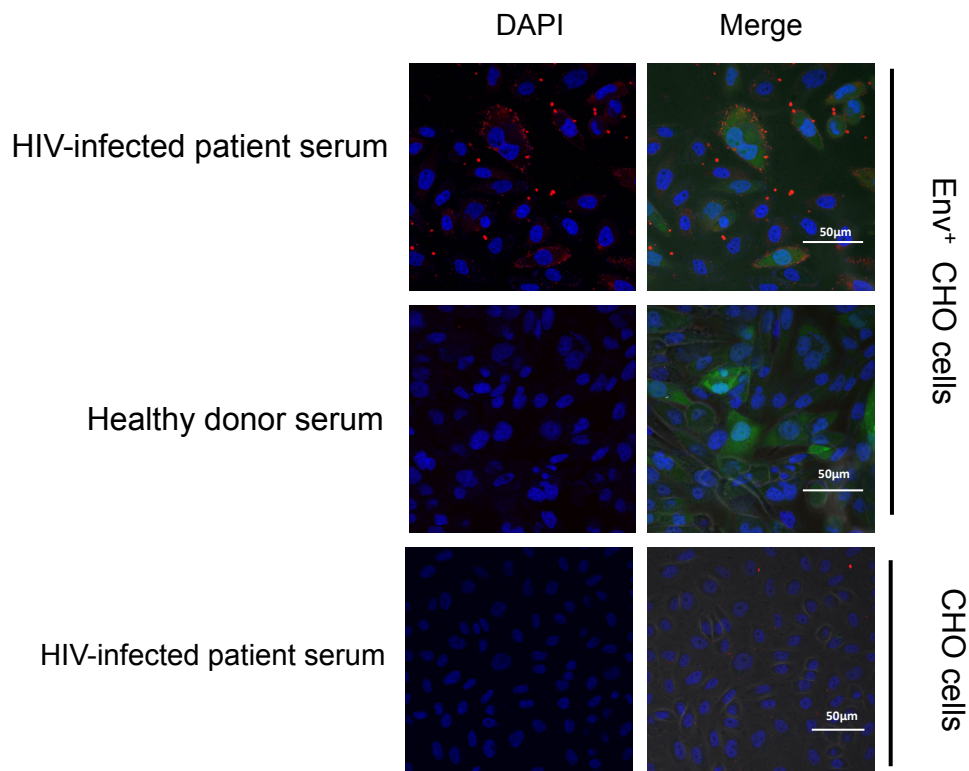

Figure S10 Confocal microscopic images show colocalization of the HIV-infected patient serum and the membrane protein Env fused with GFP on the target CHO cells.

**Figure S11**

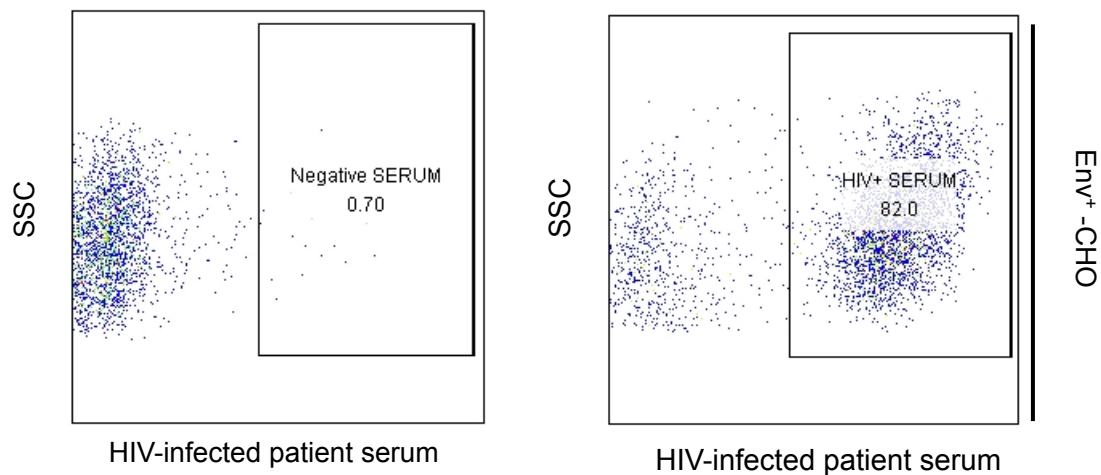

Figure S11 The membrane protein Env the surface marker of Env<sup>+</sup> cells were detected by flow cytometry for HIV-infected patient serum.
